# Supplementary material
Source: PubMed Central journal article supplement (PMC3837807)
Supplement: AEM.01952-13_zam999104975so1.pdf [file AEM.01952-13_zam999104975so1.pdf]

## **Supplemental Material to**

### **Evolved Cobalamin-Independent Methionine Synthase (MetE) Improves the Acetate and Thermal Tolerance of *Escherichia coli***

Elena A. Mordukhova and Jae-Gu Pan\*

Superbacteria Research Center, Korea Research Institute of Bioscience and  
Biotechnology (KRIBB), 111 Gwahangno, Yuseong-gu, Daejeon  
305-806, Korea

\*Corresponding author

Tel. +82428604483, [jgpan@kribb.re.kr](mailto:jgpan@kribb.re.kr)

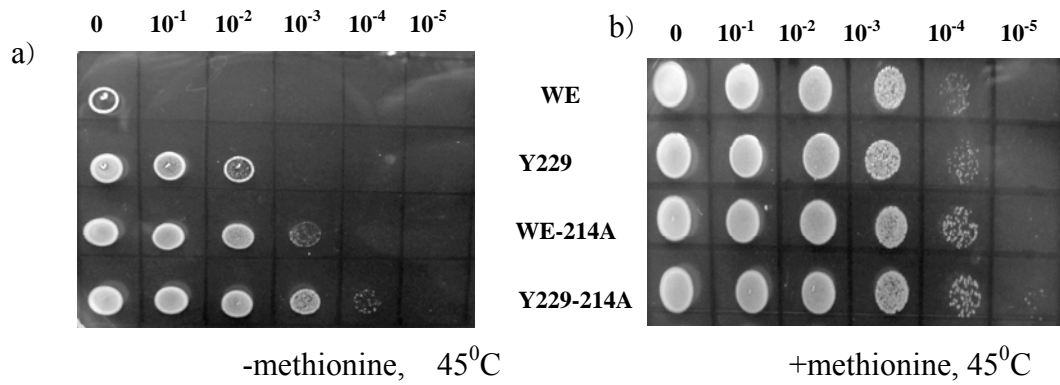

**Fig. S1 Synergic effect of the stabilized MetA/MetE enzymes on *E. coli* viability at elevated temperature.**

Serial dilutions of cultures of WE, Y229, WE-214A and Y229-214A growing logarithmically at 37°C in M9 glucose medium (OD<sub>600</sub> of 0.5) were spotted onto M9 glucose (A) or M9 glucose L-methionine (50 µg ml<sup>-1</sup>) (B) agar plates. The cells were then incubated for 24 h at 45°C.

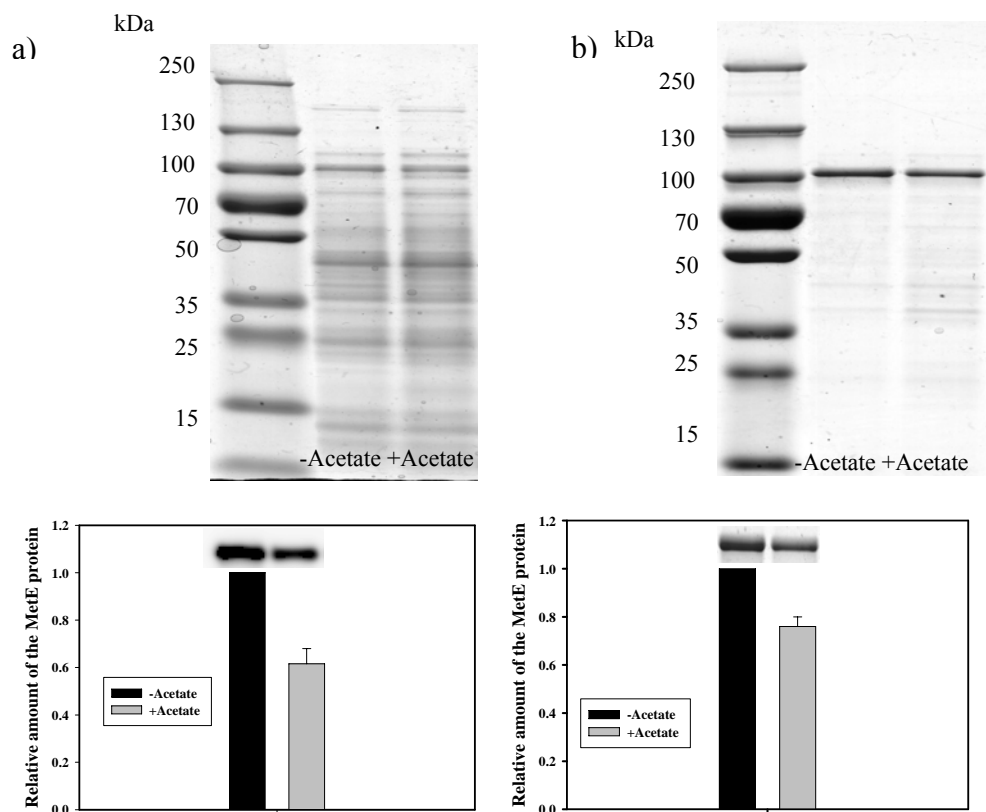

**Fig.S2 Effect of acetate stress on the native MetE protein solubility.**

(A) The WE strain was grown in 50 ml of M9 glucose medium (pH6.0) to exponential phase (approximately  $OD_{600} = 0.3$ ) at  $37^{\circ}C$ . (B) The strain BL21(DE3) harboring the plasmid pET22b/MetE was cultured in 50 ml of the LBamp<sub>100</sub> medium to an  $OD_{600}$  of 0.5 and induced with 1 mM of IPTG for 1 h. Twenty-five milliliters of each culture were treated with 20 mM sodium acetate for 2h. The remaining 25 ml were used as a control. Soluble protein fractions were purified as previously described (1,2) in the presence of EDTA-free Halt protease inhibitor cocktail (Pierce, Rockford, USA). Three (A) and two (B) micrograms of total protein from the soluble fractions were subjected to 12% SDS-PAGE, followed by Western blotting using rabbit anti-MetE antibody. The MetE in the samples was quantified through densitometry using WCIF ImageJ software. The MetE amount from the untreated cells was equal to 1. The error bars represent the standard deviations of triplicate independent cultures.

CLUSTAL 2.1 multiple sequence alignment

```

E.coli -----MTILNHTLGPFRVGLRRELKKAQESYWAGNSTRELLAVGRELRAHWDQQ 51
Salmonella -----MTILHTLGPFRVGLRRELKKAQESYWAGNATRELLAVGRELRAHWDQQ 51
Yersinia ----MGNKMTMTILNHTLGPFRVGLRRELKKAQESYWAGNSTQRELLAVGRELRAHWDQQ 56
Vibrio -----MTTTHILGYPRIGEKRELKFALEKYWRGEIDQAALKQVSSQIRCKHWALQ 50
Acidithiobacillus -----MTSVHSLGPPRIGHKRELKKALESFWSREIDQELQSRRAAQLRIHWRIQ 50
Acidobacterium MATDEASTLSLKTANLGGPRMGQQRELKFALEDYWTGKCTEQQLQNVAGQLRCSHWELQ 60
Acidiphilium -----MSIATS-LGPPRIGRRRELKSALEAHWAGELSEAGLQBAARLLRAHSHSLQ 50
Thermotoga -----MKAYAFGPPFKIGEKREPKALEDFWKGKITEBQFEEMNKLRMVMVENY 49
Streptococcus -----MTKVSSLGYPRLGENREWKLLIEAYWAGKVSKNLDFPAKAKELRIHFLKQ 50
          :*: : * . * * * * . * : . : : : : V39A : * R46C

E.coli KQAGIDLLPVGDFAWYDHVLTSLLLGNVPAHQNKDGSVDIDLTPRIGRGRAP---TS 107
Salmonella KQAGIDLLPVGDFAWYDHVLTSLLLGNVPAHQNDGSVDIDLTPRIGRGRAP---TS 107
Yersinia QQAGVDLVPVGDFAWYDHVLTSLLLGNVPERHQNDGSVIDIDLTPRIGRGRAP---TS 112
Vibrio KEAGLDFVTAGDFAWYDHVLTSLLLGHVPKRHS--HGFPDLDLTPRVGRGQSQNACGCG 108
Acidithiobacillus QTCGMDLVPVGDPSLYDHMLDMSCTLGAIPPRYGFAGQVGLDTPFAMARGSAT--- 104
Acidobacterium KTAGIDFIPSNDFSLYDQVLDMLVLLGATPPEPFGT--DTVTLPRYPFAMARNS---- 110
Acidiphilium QQLGIGHIIPSNDFPALYDHLDTACMVGAIPPGYGRWGGEVTLPTYALARGTGGG---DAA 108
Thermotoga RKN-VDVIPSNELSYDFVLDTAVMVGAVPERFG---EYRGLSTYPMARGGK---- 98
Streptococcus LNAGLDLIPVGDPSLYDHLDLDSVQFNIIPKRFPAK--EPIDIDLPAIARGNKE--- 102
          : . . . : : * * * * . . * . : : * : * . T106I

E.coli EPAAAAEMTKWFNNTNYHYMVPEFVKQQFKLTWTQQLLDEVDEALAL-GHKVKVLLGSPVT 166
Salmonella EPAAAAEMTKWFNNTNYHYMVPEFVKQQFKLTWTQQLLDEVDEALAL-GHKIKVLLGSPVT 166
Yersinia KPAAAAEMTKWFNNTNYHYMVPEFQQQQFKLGTWQLLDEVDEALAL-GHKIKVLLGSPIT 171
Vibrio TGSAAEDMTKWFNNTNYHYI VPEPSSNDTFNVSWPOLPEEVNEALQA-GHDVKVLLGSPIS 167
Acidithiobacillus --QPAMEMTKWFDNTNYHFI VPEPHEGMDPRLSSERLPDQVKEVQAL-GLKAKVPLVGPIT 161
Acidobacterium REQTAMEMTKWFDNTNYHYLVPEWSEGLSFKINSKLLGEVREARAL-GIETRFVLLGPI 169
Acidiphilium AGLPALEMTKWFDNTNYHYLVPRLAAGQHFVAVTANRPLALPREALAR-HRRTRFVLLGPI 167
Thermotoga ----ALEMTKWFNNTNYHYLVPEIET-EEFYLLLENKPLEDYLPFKSK-GIETAPFWIGPPT 152
Streptococcus --NVASSMKWFNNTNYHYI VPEWSK-QRFKLNRRLLDLLEAREVVGDKAKFVITGPIT 159
          * . * . * : * * * : * * . : : : : * : * * . :

E.coli WLWLGKVK-----GEQFDRLLSLLNDILFVYQVLAELA 199
Salmonella YLWLGKVK-----GEFDRLLTKLDILFVYQVLAELA 199
Yersinia YLWLGKVK-----GEQFDRLLSLLNDILFVYQVLAELA 204
Vibrio YLYLGKEV-----EEGFDRLTLLPRLLTAYQAILLSKLA 200
Acidithiobacillus YLWLGKEKDLNAEAHDDAQHHHDSACHGHGAPIGAACFDRLTLLPVLPVYAEILARLA 221
Acidobacterium LLLLKGKV-----DAFDPPTVTRDLIPAYQAVLAELA 201
Acidiphilium FLLLAKTD-----DGSDFLDDLDRLLPCYAQVLAELA 199
Thermotoga PLYLSKRN-----GEWIRRFNQMEKLLSLSVYKVEFKLV 189
Streptococcus YVALSTG-----VEDFTAAVKSLLELYKQVFTLV 189
          : * . . : : : : : : : : * : : * . :

E.coli KRGIIEWVQIDEPALVLELPOAWLDAFKPAYD-ALQG--QVKLLLTTFYEGVTFNLDITIA 256
Salmonella KRGIIEWVQIDEPALVLELPOAWLDAFKPAYD-ALAG--QVKLLLTTFYEGVTFNLDITIA 256
Yersinia KRGIIEWVQIDEPALVLELPOEWLDAQPAYQ-ALQG--QVKLLLTTFYFDSIGHNIDITIRA 261
Vibrio KQGVQVQVQIDEPILALELPRWQEAFLAYQ-VIRG--DVKLLLTTFYFDSVLDLTKDIVE 257
Acidithiobacillus EMGVVEVQIDEPALALDLPQEWVEALESAYQ-TLRDKTPKVLATTFYFDSVADHAKALKA 280
Acidobacterium AENVVEVQMDPEILATDLEGAEEIPRKAYA-APALSP-VKMLTTFYFERLDGNLPLAIA 259
Acidiphilium AEGCAWQMDPEVLDLAPKARAALRHAYE-TLARGATPRLLLASYPAP IADNLPALTA 258
Thermotoga ENGCKEILVNEPAPVCDLEKAWDILLNVYR----ELSEPPLTVFTYDVSVD-YEACVS 244
Streptococcus KAGASYIQVDEPIFVTDGKDYLAQAKAVYAYFAKEVDAKPIFQTYFEGGLID-SQVLSQ 248
          . : * * : . : : * . . . : * : :

E.coli LPVQGLHVDLVHGKDDVAELHK--RLPSDWLLSAGLINGRNWVRADLTEKYAQIKDIVGK 314
Salmonella LPVQGLHVDLVHGKDDVSELHQ--RLPADWLLSAGLINGRNWVRADLPEKYAQINDIVGK 314
Yersinia LPVQGLHVDVVTGHDDLAVLNK--NLPKDWLLSAGLINGRNWVRADLSSWFERLQPLVNS 319
Vibrio LPVDGLHVDISAAPAQLETIVN--RLPSDWLLSAGLINGRNWVRADLSAILARLQPVKTL 315
Acidithiobacillus LPVAGVHLDLRRAPQQLNSFLS--DYPADKVLVSLGVVDRNWRADLDALELLQPAHQ 338
Acidobacterium AHTAGLHVDAVRAPEQIEEVID--ALHPDQVLSVGCVDGRNWLTFDPSAADAMLRQAARK 317
Acidiphilium LPVAGLHLDLVRGRDDLAPVLA--AIGPATWLSGLVDGRNWRADLRAALATAREARA 316
Thermotoga LPVKRLHFDVPS--NEENLNLEKHGFPEDKLVAGVINGRQPKVVDLRKVASLVEKLG-- 301
Streptococcus LPVDAPGLDFVYGLEENLEAIKTGAPK-GKEIPAGVIDGRNIVSSDFVKTSALLETTIEQ 307
          . . * : : : : * : * * * * * :

E.coli R----DLWVASSCSLLHSPIDL SVETRLDAEVKSWFAPALQKCHELALLRDALNS---GD 367
Salmonella R----ALWVSSCSLLHSPIDL SVETRLDAEVKSWFAPALQKCGELALLRDALNS---GD 367
Yersinia R----PLWLGSSCSLLHSPIDLNEETRLDAEVKSWFAPALQKCAELALLTQALNAPNDAK 375
Vibrio LG--ERLWVASSCSLLHSPVDLLEGLDLSAETRWSFAPAKQVTEVALLGRALEG-DAAA 372
Acidithiobacillus LG--DRLWVAPSCSLLHSPVDLEQETELDAELKSWLSPSVQKLDVAIIGRALKEGVS 396
Acidobacterium LG-QARVIAAPSCSLLHVPHTLGETQLPARGWLRPAEKLAEALTALAT----GDP 370
Acidiphilium LGGSERLMIAPSCSLLHVPDLAQEDRLDPAIRFWLAPATQKLAEVATIARGLDEGEGAI 376
Thermotoga ----ASAI SNSCPLPHLPTVLEENLPGGLKEKLAFAKEKLEELKMLKDPLEK--T 353
Streptococcus SA----ALTIQFSCSLLHVPVTTIKNETDLPVLRNGLPADEKLTVEVKRLAEHLDRDPA 364
          ** . * . * * * * * : : * : * * :

```



#### REFERENCES

1. **Gur E, Biran D, Gazit E., Ron EZ.** 2002. *In vivo* aggregation of a single enzyme limits growth of *Escherichia coli* at elevated temperature. Mol.Microbiol. **46**: 1391-1397.
2. **Tomoyasu T, Mogk A, Langen H, Goloubinoff P, Bukau B.** 2001. Genetic dissection of the roles of chaperones and proteases in protein folding and degradation in the *Escherichia coli* cytosol. Mol Microbiol, **40**: 397-413.
